# Supplementary material for: Metabolome and Transcriptome Analyses Reveal Flower Color Differentiation Mechanisms in Various Sophora japonica L. Petal Types
Source: MDPI journal article supplement (doi:10.3390/biology12121466), 2023-11-25
Supplement: s1 [file s1]

Table S1. Anthocyanin candidate gene primers.

| Gene name            | Gene ID | Forward primers             | Reverse primers           |
|----------------------|---------|-----------------------------|---------------------------|
| <i>SjUGT79B</i>      | GHAGGen |                             | 5'CGTTGATGGGTGACTCAGTAT   |
| <i>l</i>             | e01140  | 5'GAAGCAGAAGCAGAAGCAGAA3'   | C3'                       |
| <i>SjDFR</i>         | GHAGGen |                             | 5'CCAACACTGGCATTCAAGAAC   |
|                      | e00696  | 5'CAGCACTCTGTGAGGCAACT3'    | T3'                       |
| <i>SjFLS</i>         | GHAGGen |                             | 5'CTAGAATCTCACGCAGGACTT   |
|                      | e21877  | 5'GAGCAACCAGGCATCACAA3'     | 3'                        |
| <i>SjF3H</i>         | GHAGGen |                             |                           |
|                      | e06185  | 5'GAGGTGTTGTCTCAGAGGCAATG3' | 5'CCAGTGTGAGGTCAGGTTGT3'  |
| <i>SjCHS1</i>        | GHAGGen |                             |                           |
|                      | e19992  | 5'ATGGTGACCGTTGAGGAGAT3'    | 5'GTGCTCGCTGTCTGTGATG3'   |
| <i>SjCHS2</i>        | GHAGGen |                             | 5'CTGTTGGTAATGCGGAAGTAG   |
|                      | e04222  | 5'TGGTGAGCGTGGAGGAGAT3'     | T3'                       |
| <i>SjF3'5'H1</i>     | GHAGGen |                             | 5'GCATTGTTCAAGGCGATGTCA   |
|                      | e03412  | 5'ATGGCGTCCGAAGGCATT3'      | 3'                        |
| <i>SjF3'5'H2</i>     | GHAGGen |                             |                           |
|                      | e27644  | 5'AGCAGCAAGTGATGATACCTAC3'  | 5'AGCAGGACCAAGACGCATA3'   |
| <i>SjPAL</i>         | GHAGGen |                             | 5'CCAGACGAGTGTTATCCATTG   |
|                      | e09401  | 5'CAGGCAAGCAACCAAGATGA3'    | A3'                       |
| <i>SjCHI</i>         | GHAGGen |                             |                           |
|                      | e13892  | 5'GGAGCTGGAAGAGAAGGATGA3'   | 5'CCTCACGGCAGTCTCAATCT3'  |
| <i>SjANS</i>         | GHAGGen |                             |                           |
|                      | e01871  | 5'CACAATATGGTGCCAGGTCTG3'   | 5'ACTTGCCGTTGCTCAGGAT3'   |
| <i>SjMYB</i>         | GHAGGen |                             |                           |
|                      | e24051  | 5'TGTAGGCTAAGATGGCTGAACT3'  | 5'TTGGCAGTCCTTCCTGGTAG3'  |
| <i>SjbHLH1</i>       | GHAGGen |                             |                           |
|                      | e13386  | 5'CACCATCCACGACGATTCCT3'    | 5'GCCGCTGAACTTGCTTCTG3'   |
| <i>SjbHLH2</i>       | GHAGGen |                             | 5'TAATCTTGCTTAGGAGGAGGC   |
|                      | e00848  | 5'TGGCGTGAGTGATGGTGAT3'     | T3'                       |
| <i>SjM-type_MADS</i> | GHAGGen |                             | 5'CTGTTGATTTCCTCGTCTCCTTC |
|                      | e06148  | 5'AACTCGGACTGATACCTGTAGG3'  | 3'                        |
| <i>SjIAA</i>         | GHAGGen |                             | 5'GTTGCTCTTGCTTATGGACTCT  |
|                      | e03678  | 5'GGCAGTGATGAGACCGAGAA3'    | 3'                        |
|                      |         | 5'CGAGGTGACCGAGCAGCAAAGA    | 5'TTGCCACATCCACCACCGTCC3  |
| <i>ubiquitin</i>     |         | G3'                         | '                         |

Table S2. qRT-PCR reaction system and reaction protocol.

| The reaction system          |              | The reaction procedure |             |             |
|------------------------------|--------------|------------------------|-------------|-------------|
| Reagents                     | Usage amount | Pre-denaturation       | 94 °C 30 s  | 1 个 Cycle   |
| TB Green Fast qPCR Mix (2X)  | 10 μL        | PCR reaction           | 94 °C 5 s   | 40 个 Cycles |
| PCR Forward Primer (10 μM)   | 0.8 μL       |                        | 60 °C 10 s  |             |
| PCR Reverse Primer (10 μM)   | 0.8 μL       |                        | 95 °C 5 s   |             |
| DNA template                 | 2 μL         | Dissolve               | 60 °C 1 min | 1 个 Cycle   |
| Rnase free dH <sub>2</sub> O | 6.4 μL       |                        | 95 °C       |             |
| Total                        | 20 μL        | Cooling                | 50 °C 30 s  | 1 个 Cycle   |

Table S3. Color variation of different petal types in *S. japonica* 'AM' mutant at different flower developmental stages.

| Petal types | L*         | a*         | b*         |
|-------------|------------|------------|------------|
| S1 QB       | 90.76±4.46 | -2.54±0.09 | 36.31±2.56 |
| S1 YB       | 80.02±3.79 | 11.00±1.09 | 17.42±0.27 |
| S1 LGB      | 83.99±3.28 | 6.41±0.28  | 26.77±2.38 |
| S2 QB       | 86.93±4.64 | -4.50±0.18 | 31.92±0.93 |
| S2 YB       | 73.26±0.59 | 15.46±2.03 | 23.30±1.38 |
| S2 LGB      | 75.91±0.67 | 7.15±0.05  | 29.04±0.12 |
| S3 QB       | 78.74±2.52 | -2.70±0.34 | 27.34±1.59 |
| S3 YB       | 75.73±3.35 | 6.53±0.35  | 18.78±0.44 |
| S3 LGB      | 78.62±0.52 | 4.40±0.06  | 22.14±1.29 |
| S4 QB       | 93.37±3.53 | -3.97±0.09 | 21.57±0.58 |
| S4 YB       | 85.19±1.96 | 4.36±0.19  | 16.06±0.69 |
| S4 LGB      | 86.05±0.76 | 3.59±0.14  | 19.86±0.68 |

Table S4. Reference genome sequence alignment.

| Sample name | Clean reads(M) | Q20 rate(%) | Q30 rate(%) | Unique_mapped (%) | Multiple_mapped (%) | Unmapped (%) |
|-------------|----------------|-------------|-------------|-------------------|---------------------|--------------|
| S1QB1       | 6,670.83       | 97.38       | 92.26       | 93.21             | 2.85                | 3.94         |
| S1QB2       | 6,671.18       | 96.98       | 91.25       | 93.82             | 2.88                | 3.30         |
| S1QB3       | 6,672.28       | 96.81       | 90.82       | 93.77             | 2.85                | 3.38         |
| S1YB1       | 6,445.19       | 96.79       | 90.84       | 94.42             | 2.74                | 2.84         |
| S1YB2       | 6,673.22       | 97.06       | 91.45       | 94.34             | 2.72                | 2.94         |
| S1YB3       | 6,666.92       | 96.65       | 90.44       | 94.26             | 2.56                | 3.18         |
| S1LGB1      | 6,667.74       | 96.51       | 90.00       | 94.57             | 2.46                | 2.97         |
| S1LGB2      | 6,669.05       | 96.50       | 89.90       | 95.01             | 2.40                | 2.59         |
| S1LGB3      | 6,671.27       | 96.66       | 90.48       | 94.63             | 2.37                | 3.00         |
| S2QB1       | 6,667.22       | 96.77       | 90.74       | 94.25             | 2.71                | 3.04         |
| S2QB2       | 6,669.68       | 96.45       | 89.77       | 92.48             | 2.80                | 4.72         |
| S2QB3       | 6,669.77       | 96.79       | 90.86       | 94.25             | 2.68                | 3.07         |
| S2YB1       | 6,669.45       | 97.36       | 92.36       | 94.78             | 2.51                | 2.71         |

| Sample<br>name | Clean<br>reads(M) | Q20<br>rate(%) | Q30<br>rate(%) | Unique_mapped<br>(%) | Multiple_mapped<br>(%) | Unmapped<br>(%) |
|----------------|-------------------|----------------|----------------|----------------------|------------------------|-----------------|
| S2YB2          | 6,672.65          | 97.01          | 91.41          | 94.66                | 2.57                   | 2.77            |
| S2YB3          | 6,667.18          | 96.59          | 90.14          | 94.81                | 2.45                   | 2.74            |
| S2LGB1         | 6,670.67          | 96.94          | 91.26          | 94.79                | 2.49                   | 2.72            |
| S2LGB2         | 6,147.63          | 96.48          | 89.93          | 94.84                | 2.51                   | 2.65            |
| S2LGB3         | 6,672.16          | 96.70          | 90.43          | 94.92                | 2.49                   | 2.59            |
| S3QB1          | 6,670.31          | 96.03          | 88.85          | 92.13                | 3.10                   | 4.77            |
| S3QB2          | 6,672.28          | 96.45          | 89.92          | 93.47                | 3.06                   | 3.47            |
| S3QB3          | 6,667.19          | 96.98          | 91.32          | 86.88                | 3.05                   | 10.07           |
| S3YB1          | 6,667.03          | 96.48          | 89.83          | 93.45                | 3.06                   | 3.49            |
| S3YB2          | 6,669.77          | 97.13          | 91.76          | 93.83                | 3.02                   | 3.15            |
| S3YB3          | 6,670.61          | 96.98          | 91.33          | 93.29                | 2.97                   | 3.74            |
| S3LGB1         | 6,671.87          | 96.91          | 91.12          | 93.62                | 2.91                   | 3.47            |
| S3LGB2         | 6,042.14          | 96.38          | 89.67          | 93.99                | 2.89                   | 3.12            |
| S3LGB3         | 6,666.67          | 96.91          | 91.14          | 93.85                | 2.89                   | 3.26            |
| S4QB1          | 6,672.92          | 97.30          | 92.18          | 93.20                | 3.07                   | 3.73            |
| S4QB2          | 6,672.57          | 97.15          | 91.82          | 92.77                | 3.31                   | 3.92            |
| S4QB3          | 6,669.25          | 96.83          | 91.02          | 90.42                | 7.94                   | 19.50           |
| S4YB1          | 6,669.44          | 96.98          | 91.24          | 92.97                | 3.24                   | 3.79            |
| S4YB2          | 6,669.62          | 97.11          | 91.69          | 92.60                | 3.30                   | 4.10            |
| S4YB3          | 6,031.44          | 96.83          | 90.97          | 93.40                | 3.36                   | 3.24            |
| S4LGB1         | 6,033.82          | 96.71          | 90.54          | 93.74                | 3.08                   | 3.18            |
| S4LGB2         | 6,664.89          | 96.71          | 90.52          | 93.57                | 3.20                   | 3.23            |
| S4LGB3         | 6,669.21          | 96.86          | 90.88          | 93.78                | 2.95                   | 3.27            |
